# Supplementary figures and images for: Phylogenetic Analyses of Sites in Different Protein Structural Environments Result in Distinct Placements of the Metazoan Root
Source: Preprints.org preprint supplement (doi:10.20944/preprints201910.0302.v1), 2019-10-27

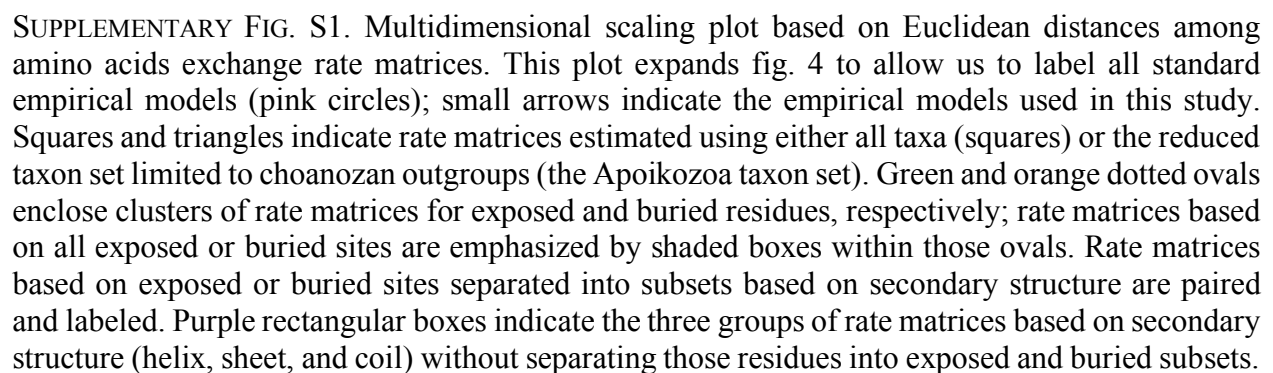

Supplement: Supplementary file 2 [file supplementary]
